# Supplementary material for: Effect of Synthetic Low-Odor Thiol-Based Hardeners Containing Hydroxyl and Methyl Groups on the Curing Behavior, Thermal, and Mechanical Properties of Epoxy Resins
Source: MDPI journal article supplement (doi:10.3390/polym15132947), 2023-07-04
Supplement: s1 [file s1]

## Supporting information

### **Effect of synthetic low-odor thiol-based hardeners containing hydroxyl and methyl groups on the curing behavior, thermal, and mechanical properties of epoxy resins**

Young-Hun Kim<sup>1,2</sup>, Jeong Ju Baek<sup>1</sup>, Ki Cheol Chang<sup>1</sup>, Baek Soo Park<sup>1</sup>, Won-Gun Koh<sup>2,\*</sup>, Gyojic Shin<sup>1,\*</sup>

<sup>1</sup>Green and Sustainable Materials R&D Department Research Institute of Clean Manufacturing System, Korea Institute of Industrial Technology (KITECH), Yangdaegiro-gil 89, Ipjang-myeon, Cheonan-si 31056, South Korea

<sup>2</sup>Department of Chemical and Biomolecular Engineering, Yonsei University, Yonsei-ro 50, Seodaemun-gu, Seoul 03722, South Korea

\*Corresponding author: wongun@yonsei.ac.kr, gyshin@kitech.re.kr

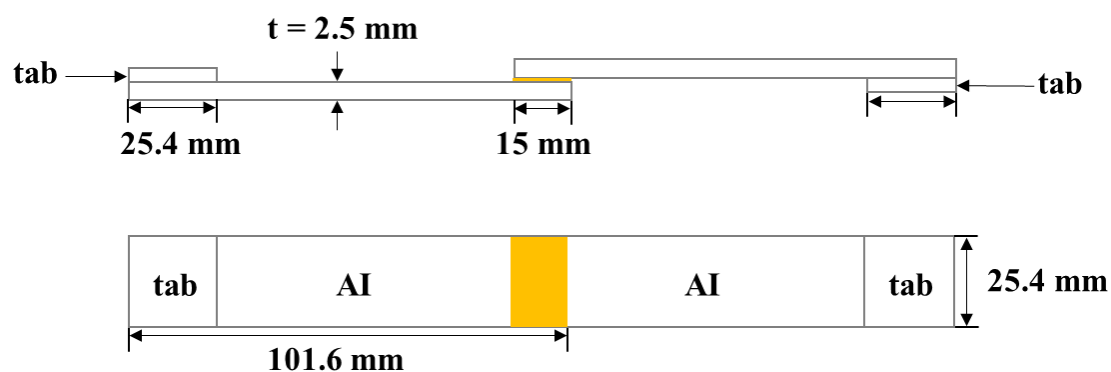

**Figure S1.** Dimensions of the lap shear specimens used in this study

**Table S1.** Dilution factor of DPETMP.

| Judge | Calculation               | Remarks           | Dilution Factor                        |
|-------|---------------------------|-------------------|----------------------------------------|
| A     | $A = \sqrt{(10)} = 5.447$ | Least (Except)    | $\sqrt[3]{(5.447 * 100 * 30)} = 25.42$ |
| B     | $B = 100$                 | →                 |                                        |
| C     | $C = \sqrt{(10)} = 5.447$ | →                 |                                        |
| D     | $D = 30$                  | →                 |                                        |
| E     | $E = 300$                 | Maximum ( Except) |                                        |

**Table S2.** Dilution factor of TFPH.

| Judge | Calculation              | Remarks           | Dilution Factor                      |
|-------|--------------------------|-------------------|--------------------------------------|
| A     | $A = \sqrt{(3)} = 1.732$ | Least (Except)    | $\sqrt[3]{(1.732 * 30 * 10)} = 8.04$ |
| B     | $B = 100$                | Maximum ( Except) |                                      |
| C     | $C = \sqrt{(3)} = 1.732$ | →                 |                                      |
| D     | $D = 10$                 | →                 |                                      |
| E     | $E = 30$                 | →                 |                                      |

**Table S3.** Dilution factor of TFPM.

| Judge | Calculation              | Remarks           | Dilution Factor                      |
|-------|--------------------------|-------------------|--------------------------------------|
| A     | A= 100                   | Maximum ( Except) | $\sqrt[3]{(1.732 * 30 * 10)} = 8.04$ |
| B     | B = 10                   | →                 |                                      |
| C     | $C = \sqrt{(3)} = 1.732$ | →                 |                                      |
| D     | $D = \sqrt{(3)} = 1.732$ | Least (Except)    |                                      |
| E     | E = 30                   | →                 |                                      |

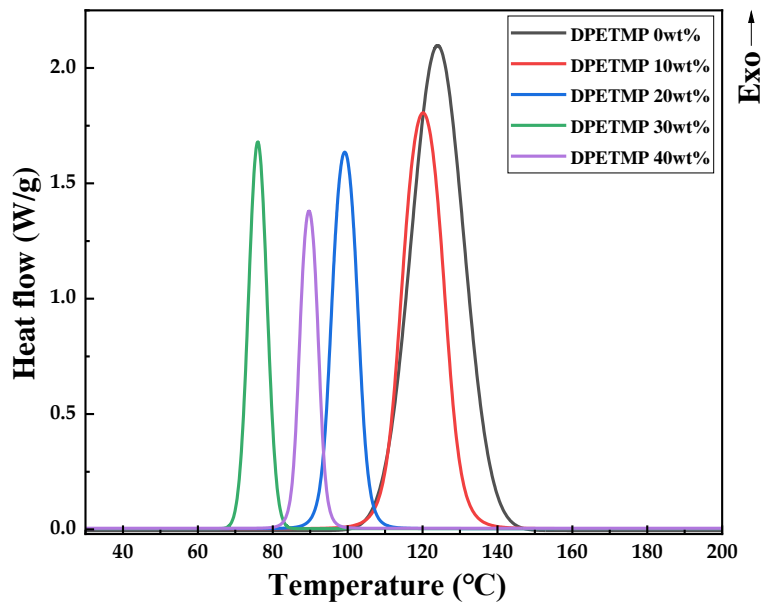

**Figure S2.** DSC traces at 5°C/min for the cure of DGEBA with the 1-MI curing agent alone and in combination with various weight percentages of DPETMP.

**Table S4.** Initial temperature ( $T_{\text{Onset}}$ ), peak temperature ( $T_{\text{p}}$ ), and heat flow for each weight percentage of DPETMP.

| Sample       | T (°C)              | Heating rate (°C/min) |        |        |        |        | $\Delta H$ (kJ/mol) |
|--------------|---------------------|-----------------------|--------|--------|--------|--------|---------------------|
|              |                     | 5                     | 10     | 15     | 20     | 30     |                     |
| DPETMP 0wt%  | $T_{\text{Onset}}$  | 98.10                 | 104.21 | 110.28 | 114.29 | 122.21 | 412.63              |
|              | $T_{\text{Peak}}$   | 123.64                | 127.68 | 130.39 | 134.65 | 138.19 |                     |
|              | $T_{\text{endset}}$ | 150.55                | 154.53 | 157.89 | 161.22 | 165.16 |                     |
| DPETMP 10wt% | $T_{\text{Onset}}$  | 95.28                 | 100.21 | 106.17 | 112.98 | 118.43 | 353.08              |
|              | $T_{\text{Peak}}$   | 120.14                | 124.88 | 129.74 | 134.25 | 138.63 |                     |
|              | $T_{\text{endset}}$ | 143.60                | 149.33 | 154.18 | 160.66 | 166.91 |                     |
| DPETMP 20wt% | $T_{\text{Onset}}$  | 82.26                 | 87.11  | 94.16  | 101.23 | 109.76 | 263.51              |
|              | $T_{\text{Peak}}$   | 99.08                 | 103.02 | 108.59 | 112.44 | 117.09 |                     |
|              | $T_{\text{endset}}$ | 116.02                | 122.49 | 128.12 | 136.37 | 143.81 |                     |
| DPETMP 30wt% | $T_{\text{Onset}}$  | 63.02                 | 70.08  | 77.29  | 84.56  | 92.07  | 229.75              |
|              | $T_{\text{Peak}}$   | 76.39                 | 77.61  | 81.55  | 86.31  | 91.39  |                     |
|              | $T_{\text{endset}}$ | 83.63                 | 92.36  | 99.47  | 106.12 | 112.04 |                     |
| DPETMP 40wt% | $T_{\text{Onset}}$  | 79.92                 | 87.88  | 95.11  | 102.52 | 108.17 | 185.15              |
|              | $T_{\text{Peak}}$   | 89.52                 | 94.42  | 98.45  | 102.01 | 107.38 |                     |
|              | $T_{\text{endset}}$ | 102.59                | 106.99 | 113.68 | 118.13 | 125.69 |                     |

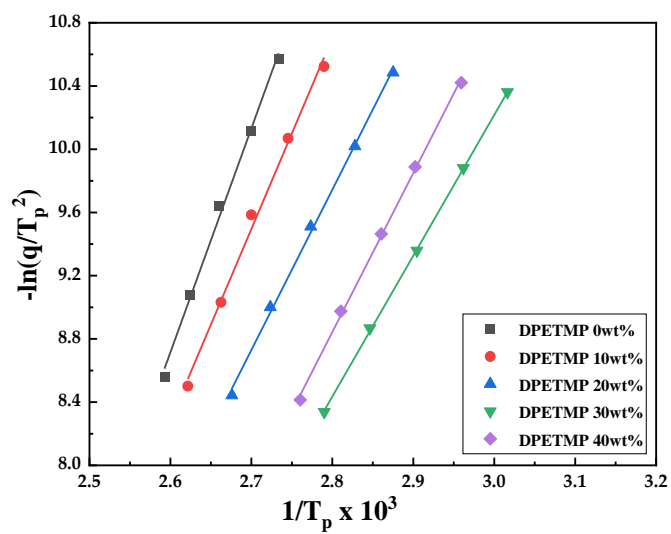

**Figure S3.** Plots of  $-\ln(q/T_p^2)$  vs.  $(1/T_p) \times 10^3$  by the Kissinger equation for the curing of DGEBA with the 1-MI curing agent alone and in combination with various weight percentages of DPETMP.

**Table S5.** Kinetic coefficients and calculated activation energies obtained from the Kissinger model as a function of the weight percentage content of DPETMP.

| Sample       | Kinetic factor        | Heating rate (°C/min) |       |       |       |       | E <sub>a</sub> (kcal/mol) |
|--------------|-----------------------|-----------------------|-------|-------|-------|-------|---------------------------|
|              |                       | 5                     | 10    | 15    | 20    | 30    |                           |
| DPETMP 0wt%  | $(1/T_P) \times 10^3$ | 2.733                 | 2.699 | 2.659 | 2.624 | 2.592 | 42.12                     |
|              | $\ln (q/T_P^2)$       | 10.56                 | 10.11 | 9.63  | 9.07  | 8.55  |                           |
| DPETMP10wt%  | $(1/T_P) \times 10^3$ | 2.789                 | 2.745 | 2.712 | 2.662 | 2.621 | 40.15                     |
|              | $\ln (q/T_P^2)$       | 10.52                 | 10.06 | 9.58  | 9.03  | 8.53  |                           |
| DPETMP 20wt% | $(1/T_P) \times 10^3$ | 2.875                 | 2.827 | 2.773 | 2.723 | 2.675 | 36.36                     |
|              | $\ln (q/T_P^2)$       | 10.48                 | 10.01 | 9.51  | 9.18  | 8.44  |                           |
| DPETMP 30wt% | $(1/T_P) \times 10^3$ | 3.016                 | 2.961 | 2.904 | 2.846 | 2.791 | 29.12                     |
|              | $\ln (q/T_P^2)$       | 10.36                 | 9.88  | 9.35  | 8.86  | 8.33  |                           |
| DPETMP40wt%  | $(1/T_P) \times 10^3$ | 2.959                 | 2.902 | 2.862 | 2.811 | 2.765 | 31.29                     |
|              | $\ln (q/T_P^2)$       | 10.42                 | 9.83  | 9.46  | 8.97  | 8.41  |                           |
